# Supplementary material
Source: PubMed Central journal article supplement (PMC5558155)
Supplement: NIHMS891250-supplement-supplement.pdf [file NIHMS891250-supplement-supplement.pdf]

## Supplementary Online Content

Tsugawa Y, Jena AB, Figueroa JF, Orav EJ, Blumenthal DM, Jha AK. Comparison of hospital mortality and readmission rates for Medicare patients treated by male vs female physicians. *JAMA Intern Med*. Published online December 19, 2016.

doi:10.1001/jamainternmed.2016.7875

### **eAppendix.** Statistical Methods

**eTable 1.** *ICD-9 (International Classification of Diseases, 9th Revision) Codes*

**eTable 2.** Hospital and Patient Characteristics by Physician Gender

**eTable 3.** Association Between Physician Gender and Patient Outcomes by Expected Mortality Rates

**eTable 4.** Analysis of Potential Mechanisms

**eTable 5.** Association Between Physician Gender and Patient Outcomes Among Hospitalist Physicians

**eTable 6.** Association Between Physician Gender and Patient Outcomes, With Patient Outcomes Attributed to Physicians Who Accounted for Largest Number of Evaluation and Management Claims

**eTable 7.** Association Between Physician Gender and Patient Outcomes, With Patient Outcomes Attributed to Physicians Who Billed the First Evaluation and Management Claim

**eTable 8.** Association Between Physician Gender and 30-Day Patient Mortality, Excluding Hospitals With a Medical ICU

**eTable 9.** Association Between Physician Gender and 60-Day Patient Outcomes

**eTable 10.** Association Between Physician Gender and Patient Outcomes, With Physician Age and Patient Age Modeled as Continuous Variables

**eTable 11.** Association Between Physician Gender and Patient Outcomes Using Logistic Regression Models

This supplementary material has been provided by the authors to give readers additional information about their work.

## **eAppendix. Statistical Methods**

### **Physician database**

Physicians responsible for care of the patient were identified by linking the National Provider Identifier (NPI) to a database developed by Doximity, a company that provides online professional networking services for U.S. physicians. Doximity has assembled information on physician specialty for all U.S. physicians (including registered members of the service and non-registered physicians) from multiple sources and data partnerships, including the National Plan and Provider Enumeration System NPI Registry, the American Board of Medical Specialties, other specialty societies, state licensing boards, and collaborating hospitals and medical schools. Approximately 95% of physicians in our Medicare sample were matched to the database. Details and validation of the Doximity database are described elsewhere.<sup>1,2</sup>

### **Statistical analysis**

We examined the association between physician gender and patient outcomes (30-day mortality and readmission rates) using multivariable linear probability models.<sup>3</sup> The linear probability model is a special case of a binomial regression model that fits an ordinary least square (OLS) regression to a binary dependent variable.<sup>3,4</sup> The regression coefficients can be interpreted as the differences in the probability of having an event – the adjusted risk difference – and the ease of interpretation often outweigh technical limitations.<sup>3</sup> We used a multivariable linear probability model for two reasons: (A) computational efficiency (given large sample size and >1,000 covariates, including DRG and hospital fixed effects), and (B) problems with complete or quasi-complete separation in logistic regression models (for some of our analyses). As a

sensitivity analysis, we compared the results from logistic regression models and those from linear probability models and showed almost identical results.

We calculated risk-adjusted 30-day mortality and readmission rates by estimating predicted probabilities of outcomes for each hospitalization with the distribution of covariates in the national sample, fixing physician gender at female versus male (known as the marginal standardization form of predictive margins).<sup>5</sup> We used Stata's "margins" command to calculate risk-adjusted patient outcomes for female and male physicians, and the standard errors were obtained using the delta method.<sup>5</sup>

### **Sensitivity analyses**

We conducted several sensitivity analyses. First, to address the possibility that female physicians may treat healthier patients, we restricted the study population to hospitalized patients treated by physicians who specialize in the care of hospitalized patients ("hospitalists"). Hospitalists typically work in shifts; therefore, within the same hospital, patients treated by hospitalists are plausibly quasi-randomized to a given physician based on when patients became sick and on hospitalists' work schedule.<sup>6</sup> We defined hospitalists using a validated approach: general internists with at least 20 evaluation and management (E&M) billings in a given year (equivalent to 5 or more E&M billings in a 5% sample used in the original study) and who filed at least 90% of their total E&M billings in an inpatient setting as defined by Current Procedural Terminology [CPT] codes (99221-99223, 99231-99233, and 99251-99255).<sup>7</sup> This minimum number was required to obtain stable estimates of the proportion of inpatient E&M billings and not to serve as the minimum number of patients treated by hospitalists. This approach for identifying

hospitalists in the Medicare sample has been validated with high sensitivity (84.2%), specificity (96.5%), and positive predictive value (88.9%).<sup>7</sup> Second, to evaluate whether our findings were sensitive to how we attributed patients to physicians, we reanalyzed our data using two alternative attribution methods: (1) attributing patients to physicians who had largest number of E&M claims and (2) attributing patients to physicians who filed the first E&M claim for a given hospitalization.<sup>8-10</sup> Third, we addressed the possibility that within some hospitals internists may practice in intensive care units (in lieu of, or in addition to, critical care specialists) and that male internists are more likely to work in intensive care units and have severely ill patients. To address this issue, we reanalyzed the data after excluding hospitals with a medical ICU. Fourth, to test whether our findings were sensitive to follow-up periods for measuring patient outcomes, we used 60-day mortality and readmissions, instead of 30-day patient outcomes. Fifth, to address the possibility that our age variables (patient age and physician age) may not be granular enough to fully account for the differences, we used age variables as continuous variables with quadratic and cubic terms to allow for non-linear relationships. Lastly, we used logistic regression models instead of linear probability models (with standard errors clustered at the physician level). To overcome a failure of the likelihood maximization algorithm to converge, we combined MS-DRG codes that had no events into clinically similar categories.<sup>11</sup>

eTable 1. ICD-9 (International Classification of Diseases, 9th Revision) Codes

| Condition                                    | ICD-9 codes                                                                                                                                                                                                                                                                                                                                                                                     |
|----------------------------------------------|-------------------------------------------------------------------------------------------------------------------------------------------------------------------------------------------------------------------------------------------------------------------------------------------------------------------------------------------------------------------------------------------------|
| <b>Sepsis</b>                                | 0031, 0202, 0223, 0362, 0380, 0381, 03810, 03811, 03812, 03819, 0382, 0383, 03840, 03841, 03842, 03843, 03844, 03849, 0388, 0389, 0545, 449, 77181, 7907, 99591, 99592                                                                                                                                                                                                                          |
| <b>Pneumonia</b>                             | 00322, 0203, 0204, 0205, 0212, 0221, 0310, 0391, 0521, 0551, 0730, 0830, 1124, 1140, 1144, 1145, 11505, 11515, 11595, 1304, 1363, 4800, 4801, 4802, 4803, 4808, 4809, 481, 4820, 4821, 4822, 4823, 48230, 48231, 48232, 48239, 4824, 48240, 48241, 48242, 48249, 4828, 48281, 48282, 48283, 48284, 48289, 4829, 483, 4830, 4831, 4838, 4841, 4843, 4845, 4846, 4847, 4848, 485, 486, 5130, 5171 |
| <b>Congestive heart failure</b>              | 39891, 4280, 4281, 42820, 42821, 42822, 42823, 42830, 42831, 42832, 42833, 42840, 42841, 42842, 42843, 4289                                                                                                                                                                                                                                                                                     |
| <b>Chronic obstructive pulmonary disease</b> | 490, 4910, 4911, 4912, 49120, 49121, 49122, 4918, 4919, 4920, 4928, 494, 4940, 4941, 496                                                                                                                                                                                                                                                                                                        |
| <b>Urinary tract infection</b>               | 03284, 59000, 59001, 59010, 59011, 5902, 5903, 59080, 59081, 5909, 5950, 5951, 5952, 5953, 5954, 59581, 59582, 59589, 5959, 5970, 59780, 59781, 59789, 59800, 59801, 5990                                                                                                                                                                                                                       |
| <b>Acute renal failure</b>                   | 5845, 5846, 5847, 5848, 5849, 586                                                                                                                                                                                                                                                                                                                                                               |
| <b>Arrhythmia</b>                            | 4270, 4271, 4272, 42731, 42732, 42760, 42761, 42769, 42781, 42789, 4279, 7850, 7851                                                                                                                                                                                                                                                                                                             |
| <b>Gastrointestinal bleeding</b>             | 4560, 45620, 5307, 53082, 53100, 53101, 53120, 53121, 53140, 53141, 53160, 53161, 53200, 53201, 53220, 53221, 53240, 53241, 53260, 53261, 53300, 53301, 53320, 53321, 53340, 53341, 53360, 53361, 53400, 53401, 53420, 53421, 53440, 53441, 53460, 53461, 5693, 5780, 5781, 5789                                                                                                                |

**eTable 2.** Hospital and Patient Characteristics by Physician Gender

|                                   |                                | <b>Female<br/>physicians<br/>N=18,751</b> | <b>Male<br/>physicians<br/>N=39,593</b> |
|-----------------------------------|--------------------------------|-------------------------------------------|-----------------------------------------|
| <b>Hospital characteristics</b>   |                                |                                           |                                         |
| Hospital size                     | Small (<100 beds)              | 1,085 (6.1%)                              | 3,268 (8.6%)                            |
|                                   | Medium (100-399 beds)          | 9,280 (52.1%)                             | 21,281 (55.7%)                          |
|                                   | Large (≥400 beds)              | 7,460 (41.9%)                             | 13,628 (35.7%)                          |
| Teaching status                   | Major                          | 5,168 (29.0%)                             | 8,061 (21.1%)                           |
|                                   | Minor                          | 6,119 (34.3%)                             | 13,015 (34.1%)                          |
|                                   | Non-teaching                   | 6,538 (36.7%)                             | 17,101 (44.8%)                          |
| Hospital region                   | Northeast                      | 4,746 (26.8%)                             | 8,574 (22.7%)                           |
|                                   | Midwest                        | 4,057 (22.9%)                             | 9,148 (24.2%)                           |
|                                   | South                          | 5,517 (31.1%)                             | 13,167 (34.8%)                          |
|                                   | West                           | 3,402 (19.2%)                             | 6,903 (18.3%)                           |
| Profit status                     | For-profit                     | 1,932 (10.8%)                             | 5,411 (14.2%)                           |
|                                   | Nonprofit                      | 13,947 (78.2%)                            | 28,850 (75.6%)                          |
|                                   | Public                         | 1,946 (10.9%)                             | 3,916 (10.3%)                           |
| RUCA                              | Urban                          | 15,669 (89.3%)                            | 31,810 (84.7%)                          |
|                                   | Suburban                       | 326 (1.9%)                                | 830 (2.2%)                              |
|                                   | Large rural                    | 1,262 (7.2%)                              | 3,886 (10.4%)                           |
|                                   | Small rural                    | 293 (1.7%)                                | 1,029 (2.7%)                            |
| ICU                               | No                             | 2,135 (11.9%)                             | 5,355 (13.9%)                           |
|                                   | Yes                            | 15,797 (88.1%)                            | 33,102 (86.1%)                          |
| <b>Patient characteristics</b>    |                                |                                           |                                         |
| Average length of stay, days (SD) |                                | 4.6 (3.9)                                 | 4.8 (4.0)                               |
| Primary diagnosis*                | Respiratory system             | 87,339 (21.0%)                            | 272,974 (22.7%)                         |
|                                   | Circulatory system             | 75,318 (18.1%)                            | 221,440 (18.5%)                         |
|                                   | Kidney & urinary tract         | 48,596 (11.7%)                            | 132,748 (11.1%)                         |
|                                   | Infectious & parasitic disease | 40,450 (9.7%)                             | 121,140 (10.1%)                         |
|                                   | Digestive system               | 43,579 (10.5%)                            | 122,097 (10.2%)                         |
|                                   | Nervous system                 | 35,973 (8.7%)                             | 101,689 (8.5%)                          |
|                                   | Others                         | 84,304 (20.3%)                            | 228,208 (19.0%)                         |
| Discharge location                | Home                           | 244,069 (58.7%)                           | 691,535 (57.6%)                         |
|                                   | Skilled nursing facility       | 110,364 (26.6%)                           | 316,375 (26.4%)                         |
|                                   | Rehabilitation facility        | 10,076 (2.4%)                             | 29,854 (2.5%)                           |
|                                   | Hospice                        | 19,838 (4.8%)                             | 53,408 (4.5%)                           |
|                                   | Others                         | 31,212 (7.5%)                             | 109,124 (9.1%)                          |

All p-values <0.001. Numbers are No. (%). Abbreviations: RUCA, rural-urban commuting area; ICU, intensive care unit; SD, standard deviation \*Defined using Major Diagnostic Category (MDC).

© 2016 American Medical Association. All rights reserved.

**eTable 3.** Association Between Physician Gender and Patient Outcomes by Expected Mortality Rates

|                                | Quintile of predicted mortality | No. of hospitalizations (No. of physicians) | Adjusted 30-day patient outcomes    |                                     | Adjusted risk difference (95%CI) Female – Male | p-value |
|--------------------------------|---------------------------------|---------------------------------------------|-------------------------------------|-------------------------------------|------------------------------------------------|---------|
|                                |                                 |                                             | Female physicians                   | Male physicians                     |                                                |         |
| <b>30-day mortality rate</b>   | 1st (Lowest)                    | 256,125 (37,348)                            | <b>1.06%</b><br>(0.98% to 1.14%)    | <b>1.16%</b><br>(1.11% to 1.21%)    | <b>-0.10%</b><br>(-0.20% to -0.01%)            | 0.04    |
|                                | 2 <sup>nd</sup>                 | 256,710 (37,500)                            | <b>2.98%</b><br>(2.84% to 3.11%)    | <b>3.08%</b><br>(3.00% to 3.16%)    | <b>-0.10%</b><br>(-0.27% to +0.06%)            | 0.21    |
|                                | 3 <sup>rd</sup>                 | 256,631 (37,529)                            | <b>6.10%</b><br>(5.90% to 6.29%)    | <b>6.43%</b><br>(6.32% to 6.54%)    | <b>-0.33%</b><br>(-0.57% to -0.10%)            | 0.005   |
|                                | 4 <sup>th</sup>                 | 256,476 (37,340)                            | <b>12.77%</b><br>(12.49% to 13.05%) | <b>13.39%</b><br>(13.23% to 13.54%) | <b>-0.62%</b><br>(-0.95% to -0.29%)            | <0.001  |
|                                | 5th (Highest)                   | 257,636 (36,660)                            | <b>32.29%</b><br>(31.89% to 32.69%) | <b>33.32%</b><br>(33.10% to 33.54%) | <b>-1.03%</b><br>(-1.51% to -0.56%)            | <0.001  |
| <b>30-day readmission rate</b> | 1st (Lowest)                    | 249,347 (37,279)                            | <b>10.45%</b><br>(10.19% to 10.70%) | <b>10.71%</b><br>(10.57% to 10.85%) | <b>-0.26%</b><br>(-0.56% to +0.04%)            | 0.09    |
|                                | 2 <sup>nd</sup>                 | 249,779 (37,496)                            | <b>13.59%</b><br>(13.31% to 13.88%) | <b>14.18%</b><br>(14.02% to 14.33%) | <b>-0.58%</b><br>(-0.92% to -0.25%)            | 0.001   |
|                                | 3 <sup>rd</sup>                 | 249,878 (37,577)                            | <b>15.92%</b><br>(15.62% to 16.22%) | <b>16.53%</b><br>(16.37% to 16.70%) | <b>-0.62%</b><br>(-0.97% to -0.26%)            | 0.001   |
|                                | 4 <sup>th</sup>                 | 249,915 (37,142)                            | <b>17.56%</b><br>(17.25% to 17.87%) | <b>18.26%</b><br>(18.09% to 18.44%) | <b>-0.70%</b><br>(-1.07% to -0.33%)            | <0.001  |
|                                | 5th (Highest)                   | 250,221 (36,671)                            | <b>17.63%</b><br>(17.32% to 17.94%) | <b>18.12%</b><br>(17.95% to 18.29%) | <b>-0.49%</b><br>(-0.86% to -0.12%)            | 0.01    |

Risk-adjusted patient outcomes with additional adjustment for physician characteristic and with hospital fixed effects (Model 3). Standard errors were clustered at the physician level.

The *P* value for interaction was <.001 for the mortality analysis and .39 for the readmission analysis.

**eTable 4. Analysis of Potential Mechanisms**

|                                |                                                         | No. of hospitalizations<br>(No. of physicians) | Patients' adjusted outcomes<br>(95% CI) |                                     | Adjusted risk difference<br>(95% CI)<br>Female – Male | p-value |
|--------------------------------|---------------------------------------------------------|------------------------------------------------|-----------------------------------------|-------------------------------------|-------------------------------------------------------|---------|
|                                |                                                         |                                                | Female physicians                       | Male physicians                     |                                                       |         |
| <b>30-day mortality rate</b>   | Additional adjustment for LOS                           | 1,283,275<br>(46,199)                          | <b>11.05%</b><br>(10.93% to 11.17%)     | <b>11.50%</b><br>(11.43% to 11.57%) | <b>-0.45%</b><br>(-0.60% to -0.31%)                   | <0.001  |
|                                | Additional adjustment for use of care*                  | 1,283,621<br>(46,201)                          | <b>11.08%</b><br>(10.95% to 11.20%)     | <b>11.49%</b><br>(11.42% to 11.56%) | <b>-0.42%</b><br>(-0.56% to -0.27%)                   | <0.001  |
|                                | Additional adjustment for discharge location            | 1,283,621<br>(46,201)                          | <b>11.16%</b><br>(11.07% to 11.26%)     | <b>11.46%</b><br>(11.41% to 11.52%) | <b>-0.30%</b><br>(-0.42% to -0.18%)                   | <0.001  |
|                                | Additional adjustment for patient volume                | 1,283,621<br>(46,201)                          | <b>10.93%</b><br>(10.81% to 11.05%)     | <b>11.54%</b><br>(11.47% to 11.61%) | <b>-0.61%</b><br>(-0.75% to -0.46%)                   | <0.001  |
|                                | Additional adjustment for physicians' years in practice | 771,270<br>(31,420)                            | <b>11.13%</b><br>(10.98% to 11.29%)     | <b>11.47%</b><br>(11.39% to 11.56%) | <b>-0.34%</b><br>(-0.52% to -0.15%)                   | <0.001  |
| <b>30-day readmission rate</b> | Additional adjustment for LOS                           | 1,248,831<br>(46,203)                          | <b>15.05%</b><br>(14.91% to 15.19%)     | <b>15.56%</b><br>(15.49% to 15.64%) | <b>-0.51%</b><br>(-0.67% to -0.35%)                   | <0.001  |
|                                | Additional adjustment for use of care*                  | 1,249,210<br>(46,205)                          | <b>15.08%</b><br>(14.94% to 15.22%)     | <b>15.55%</b><br>(15.47% to 15.62%) | <b>-0.47%</b><br>(-0.63% to -0.31%)                   | <0.001  |
|                                | Additional adjustment for discharge location            | 1,249,210<br>(46,205)                          | <b>15.05%</b><br>(14.91% to 15.18%)     | <b>15.56%</b><br>(15.48% to 15.63%) | <b>-0.51%</b><br>(-0.67% to -0.35%)                   | <0.001  |
|                                | Additional adjustment for patient volume                | 1,249,210<br>(46,205)                          | <b>15.11%</b><br>(14.97% to 15.24%)     | <b>15.54%</b><br>(15.46% to 15.61%) | <b>-0.43%</b><br>(-0.59% to -0.27%)                   | <0.001  |
|                                | Additional adjustment for physicians' years in practice | 746,971<br>(31,353)                            | <b>14.90%</b><br>(14.73% to 15.07%)     | <b>15.31%</b><br>(15.22% to 15.41%) | <b>-0.41%</b><br>(-0.61% to -0.21%)                   | <0.001  |

\*Defined as total Part B spending per hospitalization, standardized for geographical differences using the CMS method.

Risk-adjusted patient outcomes with additional adjustment for physician characteristic and with hospital fixed effects (Model 3). Standard errors were clustered at the physician level.

LOS denotes length of stay. LOS and use of care were used as continuous variables with quadratic and cubic terms, patient volume was categorized in deciles, and physicians' years in practice was categorized in 5-year increments.



**eTable 5.** Association Between Physician Gender and Patient Outcomes Among Hospitalist Physicians

|                                |                                                 | No. of hospitalizations (No. of physicians) | Patient outcomes                    |                                     | Adjusted risk difference (95%CI) Female – Male | p-value |
|--------------------------------|-------------------------------------------------|---------------------------------------------|-------------------------------------|-------------------------------------|------------------------------------------------|---------|
|                                |                                                 |                                             | Female physicians                   | Male physicians                     |                                                |         |
| <b>30-day mortality rate</b>   | Model 1: Risk-adjusted 30-day mortality rate*   | 931,397 (24,429)                            | <b>10.57%</b><br>(10.44% to 10.69%) | <b>11.21%</b><br>(11.12% to 11.30%) | <b>-0.65%</b><br>(-0.80% to -0.49%)            | <0.001  |
|                                | Model 2: Model 1 + hospital fixed effects       | 931,394 (24,429)                            | <b>10.68%</b><br>(10.56% to 10.80%) | <b>11.16%</b><br>(11.08% to 11.24%) | <b>-0.48%</b><br>(-0.64% to -0.33%)            | <0.001  |
|                                | Model 3: Model 2 + physician characteristics    | 737,986 (18,883)                            | <b>10.80%</b><br>(10.66% to 10.94%) | <b>11.17%</b><br>(11.08% to 11.26%) | <b>-0.37%</b><br>(-0.55% to -0.19%)            | <0.001  |
| <b>30-day readmission rate</b> | Model 1: Risk-adjusted 30-day readmission rate* | 914,108 (24,461)                            | <b>14.65%</b><br>(14.51% to 14.80%) | <b>15.10%</b><br>(15.00% to 15.20%) | <b>-0.45%</b><br>(-0.62% to -0.27%)            | <0.001  |
|                                | Model 2: Model 1 + hospital fixed effects       | 914,108 (24,461)                            | <b>14.59%</b><br>(14.45% to 14.72%) | <b>15.13%</b><br>(15.04% to 15.22%) | <b>-0.54%</b><br>(-0.71% to -0.37%)            | <0.001  |
|                                | Model 3: Model 2 + physician characteristics    | 724,539 (18,906)                            | <b>14.64%</b><br>(14.48% to 14.79%) | <b>15.11%</b><br>(15.02% to 15.21%) | <b>-0.47%</b><br>(-0.67% to -0.28%)            | <0.001  |

\*Risk-adjustment using patients' age, gender, race, primary diagnosis, coexisting conditions (Elixhauser comorbidity index), median household income, Medicaid status, and year indicators.

**eTable 6.** Association Between Physician Gender and Patient Outcomes, With Patient Outcomes Attributed to Physicians Who Accounted for Largest Number of Evaluation and Management Claims

|                                |                                                 | No. of hospitalizations (No. of physicians) | Patient outcomes (95%CI)            |                                     | Adjusted risk difference (95%CI)<br>Female – Male | p-value |
|--------------------------------|-------------------------------------------------|---------------------------------------------|-------------------------------------|-------------------------------------|---------------------------------------------------|---------|
|                                |                                                 |                                             | Female physicians                   | Male physicians                     |                                                   |         |
| <b>30-day mortality rate</b>   | Model 1: Risk-adjusted 30-day mortality rate*   | 1,554,208 (135,249)                         | <b>10.83%</b><br>(10.72% to 10.94%) | <b>11.31%</b><br>(11.25% to 11.38%) | <b>-0.48%</b><br>(-0.61% to -0.36%)               | <0.001  |
|                                | Model 2: Model 1 + hospital fixed effects       | 1,554,208 (135,249)                         | <b>10.94%</b><br>(10.84% to 11.05%) | <b>11.28%</b><br>(11.22% to 11.34%) | <b>-0.33%</b><br>(-0.46% to -0.21%)               | <0.001  |
|                                | Model 3: Model 2 + physician characteristics    | 1,278,404 (113,491)                         | <b>11.12%</b><br>(11.00% to 11.25%) | <b>11.26%</b><br>(11.20% to 11.33%) | <b>-0.14%</b><br>(-0.28% to 0.00%)                | 0.051   |
| <b>30-day readmission rate</b> | Model 1: Risk-adjusted 30-day readmission rate* | 1,511,279 (133,160)                         | <b>15.11%</b><br>(14.98% to 15.24%) | <b>15.58%</b><br>(15.51% to 15.66%) | <b>-0.47%</b><br>(-0.62% to -0.32%)               | <0.001  |
|                                | Model 2: Model 1 + hospital fixed effects       | 1,511,279 (133,160)                         | <b>15.13%</b><br>(15.00% to 15.25%) | <b>15.58%</b><br>(15.51% to 15.65%) | <b>-0.45%</b><br>(-0.59% to -0.30%)               | <0.001  |
|                                | Model 3: Model 2 + physician characteristics    | 1,243,155 (111,714)                         | <b>15.12%</b><br>(14.98% to 15.27%) | <b>15.59%</b><br>(15.51% to 15.66%) | <b>-0.47%</b><br>(-0.63% to -0.30%)               | <0.001  |

\*Risk-adjustment using patients' age, gender, race, primary diagnosis, coexisting conditions (Elixhauser comorbidity index), median household income, Medicaid status, and year indicators.

When there were multiple physicians billing equal number of E&M claims for a given hospitalization, we randomly picked one physician among the group of physicians with the largest number of E&M claims. This is why the sample sizes were different from our main model.

**eTable 7.** Association Between Physician Gender and Patient Outcomes, With Patient Outcomes Attributed to Physicians Who Billed the First Evaluation and Management Claim

|                                |                                                 | No. of hospitalizations (No. of physicians) | Patient outcomes (95%CI)            |                                     | Adjusted risk difference (95%CI) Female – Male | p-value |
|--------------------------------|-------------------------------------------------|---------------------------------------------|-------------------------------------|-------------------------------------|------------------------------------------------|---------|
|                                |                                                 |                                             | Female physicians                   | Male physicians                     |                                                |         |
| <b>30-day mortality rate</b>   | Model 1: Risk-adjusted 30-day mortality rate*   | 1,536,205 (156,166)                         | <b>10.83%</b><br>(10.73% to 10.93%) | <b>11.32%</b><br>(11.25% to 11.38%) | <b>-0.49%</b><br>(-0.61% to -0.37%)            | <0.001  |
|                                | Model 2: Model 1 + hospital fixed effects       | 1,536,205 (156,166)                         | <b>10.93%</b><br>(10.83% to 11.03%) | <b>11.29%</b><br>(11.23% to 11.34%) | <b>-0.36%</b><br>(-0.47% to -0.24%)            | <0.001  |
|                                | Model 3: Model 2 + physician characteristics    | 1,263,893 (131,262)                         | <b>11.14%</b><br>(11.03% to 11.26%) | <b>11.32%</b><br>(11.26% to 11.38%) | <b>-0.17%</b><br>(-0.31% to -0.04%)            | 0.01    |
| <b>30-day readmission rate</b> | Model 1: Risk-adjusted 30-day readmission rate* | 1,493,582 (155,475)                         | <b>15.14%</b><br>(15.01% to 15.27%) | <b>15.53%</b><br>(15.46% to 15.60%) | <b>-0.39%</b><br>(-0.54% to -0.24%)            | <0.001  |
|                                | Model 2: Model 1 + hospital fixed effects       | 1,493,582 (155,475)                         | <b>15.18%</b><br>(15.06% to 15.30%) | <b>15.52%</b><br>(15.45% to 15.59%) | <b>-0.34%</b><br>(-0.48% to -0.20%)            | <0.001  |
|                                | Model 3: Model 2 + physician characteristics    | 1,228,798 (130,637)                         | <b>15.20%</b><br>(15.06% to 15.34%) | <b>15.55%</b><br>(15.48% to 15.62%) | <b>-0.35%</b><br>(-0.51% to -0.19%)            | <0.001  |

\*Risk-adjustment using patients' age, gender, race, primary diagnosis, coexisting conditions (Elixhauser comorbidity index), median household income, Medicaid status, and year indicators.

**eTable 8.** Association Between Physician Gender and 30-Day Patient Mortality, Excluding Hospitals With a Medical ICU

|                                |                                                 | No. of hospitalizations (No. of physicians) | Patient outcomes (95%CI)            |                                     | Adjusted risk difference (95%CI) Female – Male | p-value |
|--------------------------------|-------------------------------------------------|---------------------------------------------|-------------------------------------|-------------------------------------|------------------------------------------------|---------|
|                                |                                                 |                                             | Female physicians                   | Male physicians                     |                                                |         |
| <b>30-day mortality rate</b>   | Model 1: Risk-adjusted 30-day mortality rate*   | 204,449 (11,916)                            | <b>11.11%</b><br>(10.80% to 11.42%) | <b>11.68%</b><br>(11.49% to 11.86%) | <b>-0.57%</b><br>(-0.93% to -0.20%)            | 0.002   |
|                                | Model 2: Model 1 + hospital fixed effects       | 204,445 (11,914)                            | <b>11.17%</b><br>(10.87% to 11.47%) | <b>11.66%</b><br>(11.49% to 11.83%) | <b>-0.49%</b><br>(-0.84% to -0.13%)            | 0.01    |
|                                | Model 3: Model 2 + physician characteristics    | 167,220 (9,598)                             | <b>11.16%</b><br>(10.80% to 11.53%) | <b>11.78%</b><br>(11.60% to 11.96%) | <b>-0.62%</b><br>(-1.04% to -0.19%)            | 0.004   |
| <b>30-day readmission rate</b> | Model 1: Risk-adjusted 30-day readmission rate* | 196,032 (11,136)                            | <b>15.21%</b><br>(14.82% to 15.60%) | <b>15.96%</b><br>(15.74% to 16.17%) | <b>-0.74%</b><br>(-1.18% to -0.30%)            | 0.001   |
|                                | Model 2: Model 1 + hospital fixed effects       | 196,032 (11,136)                            | <b>15.46%</b><br>(15.10% to 15.83%) | <b>15.88%</b><br>(15.70% to 16.06%) | <b>-0.42%</b><br>(-0.84% to -0.001%)           | 0.049   |
|                                | Model 3: Model 2 + physician characteristics    | 160,172 (8,969)                             | <b>15.34%</b><br>(14.92% to 15.75%) | <b>15.94%</b><br>(15.74% to 16.13%) | <b>-0.60%</b><br>(-1.08% to -0.12%)            | 0.01    |

\*Risk-adjustment using patients' age, gender, race, primary diagnosis, coexisting conditions (Elixhauser comorbidity index), median household income, Medicaid status, and year indicators.

**eTable 9.** Association Between Physician Gender and 60-Day Patient Outcomes

|                                |                                                 | No. of hospitalizations<br>(No. of physicians) | Patient outcomes<br>(95%CI)         |                                     | Adjusted risk difference<br>(95%CI)<br>Female – Male | p-value |
|--------------------------------|-------------------------------------------------|------------------------------------------------|-------------------------------------|-------------------------------------|------------------------------------------------------|---------|
|                                |                                                 |                                                | Female physicians                   | Male physicians                     |                                                      |         |
| <b>60-day mortality rate</b>   | Model 1: Risk-adjusted 60-day mortality rate*   | 1,553,050<br>(57,591)                          | <b>15.07%</b><br>(14.95% to 15.19%) | <b>15.88%</b><br>(15.80% to 15.96%) | <b>-0.81%</b><br>(-0.96% to -0.66%)                  | <0.001  |
|                                | Model 2: Model 1 + hospital fixed effects       | 1,553,047<br>(57,591)                          | <b>15.20%</b><br>(15.09% to 15.32%) | <b>15.84%</b><br>(15.76% to 15.91%) | <b>-0.63%</b><br>(-0.77% to -0.49%)                  | <0.001  |
|                                | Model 3: Model 2 + physician characteristics    | 1,260,252<br>(46,015)                          | <b>15.36%</b><br>(15.22% to 15.49%) | <b>15.88%</b><br>(15.80% to 15.96%) | <b>-0.52%</b><br>(-0.69% to -0.36%)                  | <0.001  |
| <b>60-day readmission rate</b> | Model 1: Risk-adjusted 60-day readmission rate* | 1,512,895<br>(57,561)                          | <b>22.53%</b><br>(22.38% to 22.68%) | <b>23.19%</b><br>(23.09% to 23.29%) | <b>-0.66%</b><br>(-0.84% to -0.48%)                  | <0.001  |
|                                | Model 2: Model 1 + hospital fixed effects       | 1,512,895<br>(57,561)                          | <b>22.57%</b><br>(22.43% to 22.71%) | <b>23.18%</b><br>(23.10% to 23.26%) | <b>-0.61%</b><br>(-0.78% to -0.44%)                  | <0.001  |
|                                | Model 3: Model 2 + physician characteristics    | 1,227,536<br>(46,010)                          | <b>22.62%</b><br>(22.46% to 22.78%) | <b>23.19%</b><br>(23.10% to 23.28%) | <b>-0.57%</b><br>(-0.76% to -0.37%)                  | <0.001  |

\*Risk-adjustment using patients' age, gender, race, primary diagnosis, coexisting conditions (Elixhauser comorbidity index), median household income, Medicaid status, and year indicators.

**eTable 10.** Association Between Physician Gender and Patient Outcomes, With Physician Age and Patient Age Modeled as Continuous Variables

|                                |                                                 | No. of hospitalizations<br>(No. of physicians) | Patient outcomes<br>(95%CI)         |                                     | Adjusted risk difference<br>(95%CI)<br>Female – Male | p-value |
|--------------------------------|-------------------------------------------------|------------------------------------------------|-------------------------------------|-------------------------------------|------------------------------------------------------|---------|
|                                |                                                 |                                                | Female physicians                   | Male physicians                     |                                                      |         |
| <b>30-day mortality rate</b>   | Model 1: Risk-adjusted 30-day mortality rate*   | 1,583,028<br>(57,896)                          | <b>10.82%</b><br>(10.71% to 10.93%) | <b>11.49%</b><br>(11.42% to 11.56%) | <b>-0.67%</b><br>(-0.80% to -0.54%)                  | <0.001  |
|                                | Model 2: Model 1 + hospital fixed effects       | 1,583,024<br>(57,896)                          | <b>10.91%</b><br>(10.81% to 11.01%) | <b>11.46%</b><br>(11.40% to 11.52%) | <b>-0.55%</b><br>(-0.67% to -0.42%)                  | <0.001  |
|                                | Model 3: Model 2 + physician characteristics    | 1,283,621<br>(46,201)                          | <b>11.07%</b><br>(10.95% to 11.20%) | <b>11.49%</b><br>(11.42% to 11.56%) | <b>-0.42%</b><br>(-0.56% to -0.27%)                  | <0.001  |
| <b>30-day readmission rate</b> | Model 1: Risk-adjusted 30-day readmission rate* | 1,540,797<br>(57,876)                          | <b>15.01%</b><br>(14.89% to 15.14%) | <b>15.57%</b><br>(15.49% to 15.65%) | <b>-0.56%</b><br>(-0.70% to -0.41%)                  | <0.001  |
|                                | Model 2: Model 1 + hospital fixed effects       | 1,540,797<br>(57,876)                          | <b>15.00%</b><br>(14.89% to 15.13%) | <b>15.57%</b><br>(15.50% to 15.64%) | <b>-0.56%</b><br>(-0.70% to -0.42%)                  | <0.001  |
|                                | Model 3: Model 2 + physician characteristics    | 1,249,210<br>(46,205)                          | <b>15.02%</b><br>(14.88% to 15.15%) | <b>15.57%</b><br>(15.49% to 15.64%) | <b>-0.55%</b><br>(-0.71% to -0.39%)                  | <0.001  |

\*Risk-adjustment using patients' age, gender, race, primary diagnosis, coexisting conditions (Elixhauser comorbidity index), median household income, Medicaid status, and year indicators.

**eTable 11.** Association Between Physician Gender and Patient Outcomes Using Logistic Regression Models

|                                |                                                 | No. of hospitalizations<br>(No. of physicians) | Patient outcomes<br>(95%CI)         |                                     | Adjusted odds ratio<br>(95%CI)<br>Female vs Male | p-value |
|--------------------------------|-------------------------------------------------|------------------------------------------------|-------------------------------------|-------------------------------------|--------------------------------------------------|---------|
|                                |                                                 |                                                | Female physicians                   | Male physicians                     |                                                  |         |
| <b>30-day mortality rate</b>   | Model 1: Risk-adjusted 30-day mortality rate*   | 1,582,979<br>(57,895)                          | <b>10.81%</b><br>(10.70% to 10.92%) | <b>11.49%</b><br>(11.42% to 11.56%) | <b>0.92</b><br>(0.91 to 0.94)                    | <0.001  |
|                                | Model 2: Model 1 + hospital fixed effects       | 1,582,031<br>(57,731)                          | <b>10.90%</b><br>(10.80% to 11.01%) | <b>11.47%</b><br>(11.41% to 11.53%) | <b>0.93</b><br>(0.92 to 0.95)                    | <0.001  |
|                                | Model 3: Model 2 + physician characteristics    | 1,282,626<br>(46,059)                          | <b>11.07%</b><br>(10.94% to 11.19%) | <b>11.50%</b><br>(11.43% to 11.57%) | <b>0.95</b><br>(0.93 to 0.97)                    | <0.001  |
| <b>30-day readmission rate</b> | Model 1: Risk-adjusted 30-day readmission rate* | 1,540,793<br>(57,876)                          | <b>15.02%</b><br>(14.89% to 15.14%) | <b>15.57%</b><br>(15.49% to 15.64%) | <b>0.96</b><br>(0.95 to 0.97)                    | <0.001  |
|                                | Model 2: Model 1 + hospital fixed effects       | 1,540,044<br>(57,706)                          | <b>15.02%</b><br>(14.90% to 15.14%) | <b>15.57%</b><br>(15.50% to 15.64%) | <b>0.96</b><br>(0.95 to 0.97)                    | <0.001  |
|                                | Model 3: Model 2 + physician characteristics    | 1,248,503<br>(46,036)                          | <b>15.03%</b><br>(14.89% to 15.16%) | <b>15.57%</b><br>(15.50% to 15.65%) | <b>0.96</b><br>(0.95 to 0.97)                    | <0.001  |

\*Risk-adjustment using patients' age, gender, race, primary diagnosis, coexisting conditions (Elixhauser comorbidity index), median household income, Medicaid status, and year indicators.

## REFERENCES

1. Jena AB, Khullar D, Ho O, Olenski AR, Blumenthal DM. Sex Differences in Academic Rank in US Medical Schools in 2014. *JAMA*. 2015;314(11):1149-1158.
2. Jena AB, Olenski AR, Blumenthal DM. Sex Differences in Physician Salary in US Public Medical Schools. *JAMA Intern Med*. 2016.
3. Wooldridge JM. *Econometric analysis of cross section and panel data*. MIT press; 2010.
4. Hellevik O. Linear versus logistic regression when the dependent variable is a dichotomy. *Quality & Quantity*. 2009;43(1):59-74.
5. Williams R. Using the margins command to estimate and interpret adjusted predictions and marginal effects. *Stata Journal*. 2012;12(2):308.
6. Hinami K, Whelan CT, Miller JA, Wolosin RJ, Wetterneck TB, Society of Hospital Medicine Career Satisfaction Task F. Job characteristics, satisfaction, and burnout across hospitalist practice models. *J Hosp Med*. 2012;7(5):402-410.
7. Kuo YF, Sharma G, Freeman JL, Goodwin JS. Growth in the care of older patients by hospitalists in the United States. *N Engl J Med*. 2009;360(11):1102-1112.
8. McWilliams JM, Hatfield LA, Chernew ME, Landon BE, Schwartz AL. Early Performance of Accountable Care Organizations in Medicare. *N Engl J Med*. 2016;374(24):2357-2366.
9. McWilliams JM, Landon BE, Chernew ME, Zaslavsky AM. Changes in Patients' Experiences in Medicare Accountable Care Organizations. *N Engl J Med*. 2014;371(18):1715-1724.
10. Adams JL, Mehrotra A, Thomas JW, McGlynn EA. Physician cost profiling--reliability and risk of misclassification. *N Engl J Med*. 2010;362(11):1014-1021.
11. Heinze G, Schemper M. A solution to the problem of separation in logistic regression. *Stat Med*. 2002;21(16):2409-2419.
